# Supplementary material for: T cells targeted to TdT kill leukemic lymphoblasts while sparing normal lymphocytes
Source: PubMed Central journal article supplement (PMC9005346; doi:10.1038/s41587-021-01089-x), 2021-12-06
Supplement: 41587_2021_1089_MOESM1_ESM.pdf [file 41587_2021_1089_MOESM1_ESM.pdf]

---

**Supplementary information**

---

**T cells targeted to TdT kill leukemic lymphoblasts while sparing normal lymphocytes**

---

In the format provided by the authors and unedited

# T cells targeted to TdT kill leukemic lymphoblasts while sparing normal lymphocytes

Muhammad Ali<sup>1,2,\*</sup>, Eirini Giannakopoulou<sup>1,2,\*</sup>, Yingqian Li<sup>1,2</sup>, Madeleine Lehander<sup>3</sup>, Stina Virding Culleton<sup>3</sup>, Weiwen Yang<sup>1,2</sup>, Cathrine Knetter<sup>1,2</sup>, Mete Can Odabasi<sup>4</sup>, Ravi Chand Bollineni<sup>1,2</sup>, Xinbo Yang<sup>5</sup>, Zsofia Foldvari<sup>1,2</sup>, Maxi-Lu Böschén<sup>1,2</sup>, Eli Taraldsrud<sup>1,2</sup>, Erlend Strønen<sup>1,2</sup>, Mireille Toebe<sup>6</sup>, Amy Hillen<sup>3</sup>, Stefania Mazzi<sup>3</sup>, Arnoud H. de Ru<sup>7</sup>, George M.C. Janssen<sup>7</sup>, Arne Kolstad<sup>8,2</sup>, Geir Erland Tjønnfjord<sup>9</sup>, Benedicte A. Lie<sup>10</sup>, Marieke Griffioen<sup>11</sup>, Sören Lehmann<sup>3,12</sup>, Liv Toril Osnes<sup>13</sup>, Jochen Buechner<sup>14</sup>, K. Christopher Garcia<sup>5</sup>, Ton N. Schumacher<sup>6,15</sup>, Peter A. van Veelen<sup>7</sup>, Matthias Leisegang<sup>4,16,17,18</sup>, Sten Eirik W. Jacobsen<sup>3,19,20,21‡</sup>, Petter Woll<sup>3‡</sup>, Johanna Olweus<sup>1,2#</sup>

<sup>1</sup>Department of Cancer Immunology, Institute for Cancer Research, Oslo University Hospital Radiumhospitalet, Oslo, Norway

<sup>2</sup>K.G. Jebsen Center for Cancer Immunotherapy, Institute of Clinical Medicine, University of Oslo, Norway

<sup>3</sup>Department of Medicine Huddinge, Center for Hematology and Regenerative Medicine, Karolinska Institutet, Stockholm, Sweden

<sup>4</sup>Charité – Universitätsmedizin Berlin, Institute of Immunology, Berlin, Germany

<sup>5</sup>Departments of Molecular and Cellular Physiology and Structural Biology, Stanford University School of Medicine, Stanford, CA, USA

<sup>6</sup>Division of Molecular Oncology & Immunology, OncoCode Institute, The Netherlands Cancer Institute, Amsterdam, The Netherlands

<sup>7</sup>Center for Proteomics and Metabolomics, Leiden University Medical Center, Leiden, The Netherlands

<sup>8</sup>Department of Oncology, Oslo University Hospital Radiumhospitalet, Oslo, Norway

<sup>9</sup>Department of Haematology, Oslo University Hospital and KG Jebsen Center for B cell malignancies, Institute of Clinical Medicine, University of Oslo, Oslo, Norway

<sup>10</sup>Department of Medical Genetics, University of Oslo and Oslo University Hospital, Oslo, Norway

<sup>11</sup>Department of Hematology, Leiden University Medical Center, Leiden, The Netherlands

<sup>12</sup>Department of Medical Sciences, Uppsala University Hospital, Uppsala, Sweden

<sup>13</sup>Department of Immunology, Oslo University Hospital, Oslo, Norway

<sup>14</sup>Department of Pediatric Hematology and Oncology, Oslo University Hospital, Oslo, Norway

<sup>15</sup>Department of Immunohematology and Bloodtransfusion, Leiden University Medical Center, Leiden, The Netherlands

<sup>16</sup>David and Etta Jonas Center for Cellular Therapy, The University of Chicago, Chicago, IL 60637, USA

<sup>17</sup>German Cancer Consortium (DKTK), partner site Berlin, Berlin, Germany

<sup>18</sup>German Cancer Research Center (DKFZ), Heidelberg, Germany

<sup>19</sup>Department of Cell and Molecular Biology, Karolinska Institutet, Stockholm, Sweden

<sup>20</sup>Karolinska University Hospital, Stockholm, Sweden

<sup>21</sup>MRC Molecular Haematology Unit, MRC Weatherall Institute of Molecular Medicine, University of Oxford, Oxford, UK

\* These authors contributed equally to this work.

‡ These authors jointly supervised work

# Corresponding author

# SUPPLEMENTARY INFORMATION

## SUPPLEMENTARY FIGURES

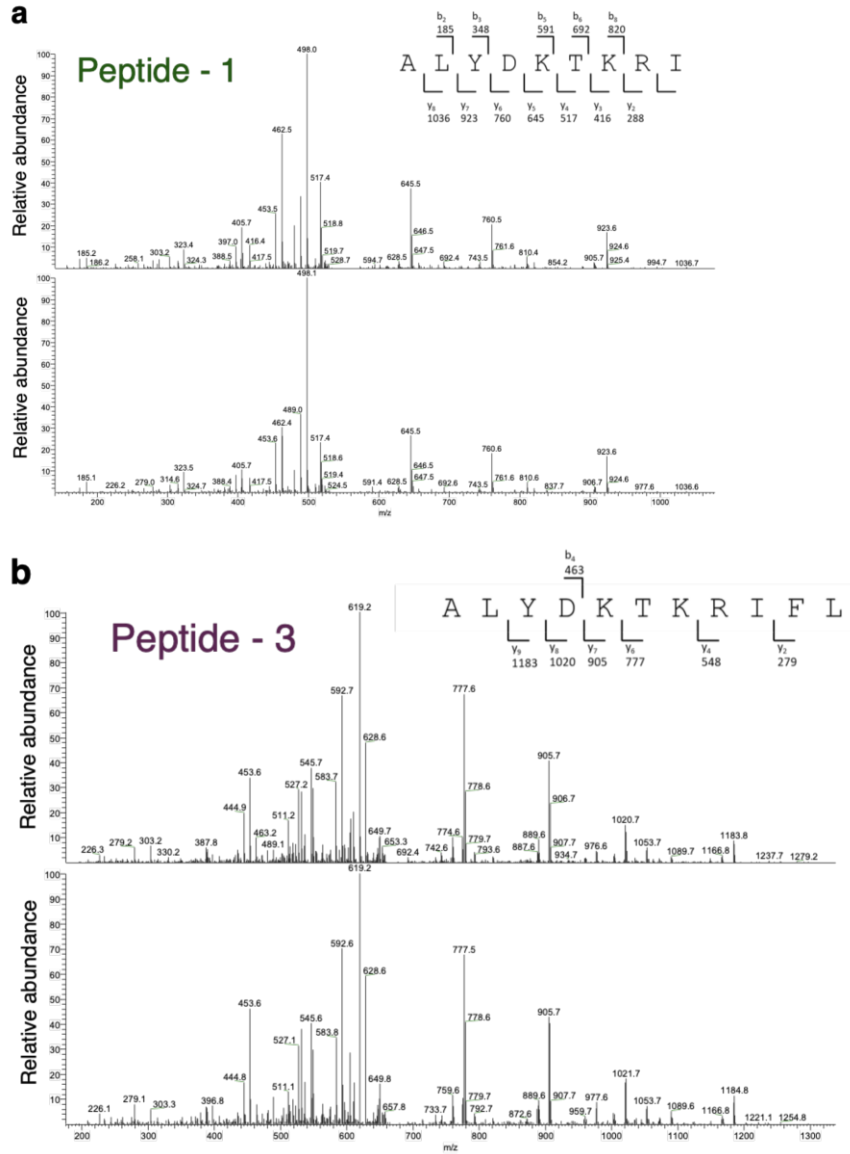

**Supplementary Fig. 1: Confirmation of correctly identified peptide-1 and -3**

(a,b) Eluted spectra (top) and synthetic peptide spectra (bottom) of peptide-1 (a) and peptide-3 (b) were used to confirm matching fragmentation spectra.

**a**

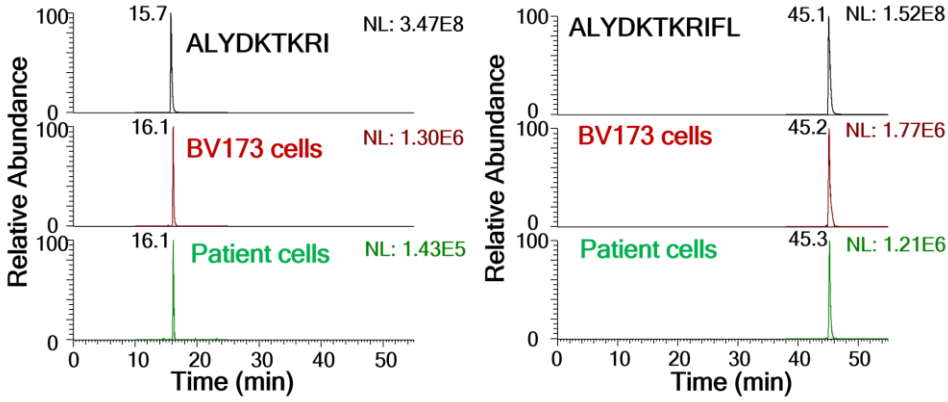

**b**

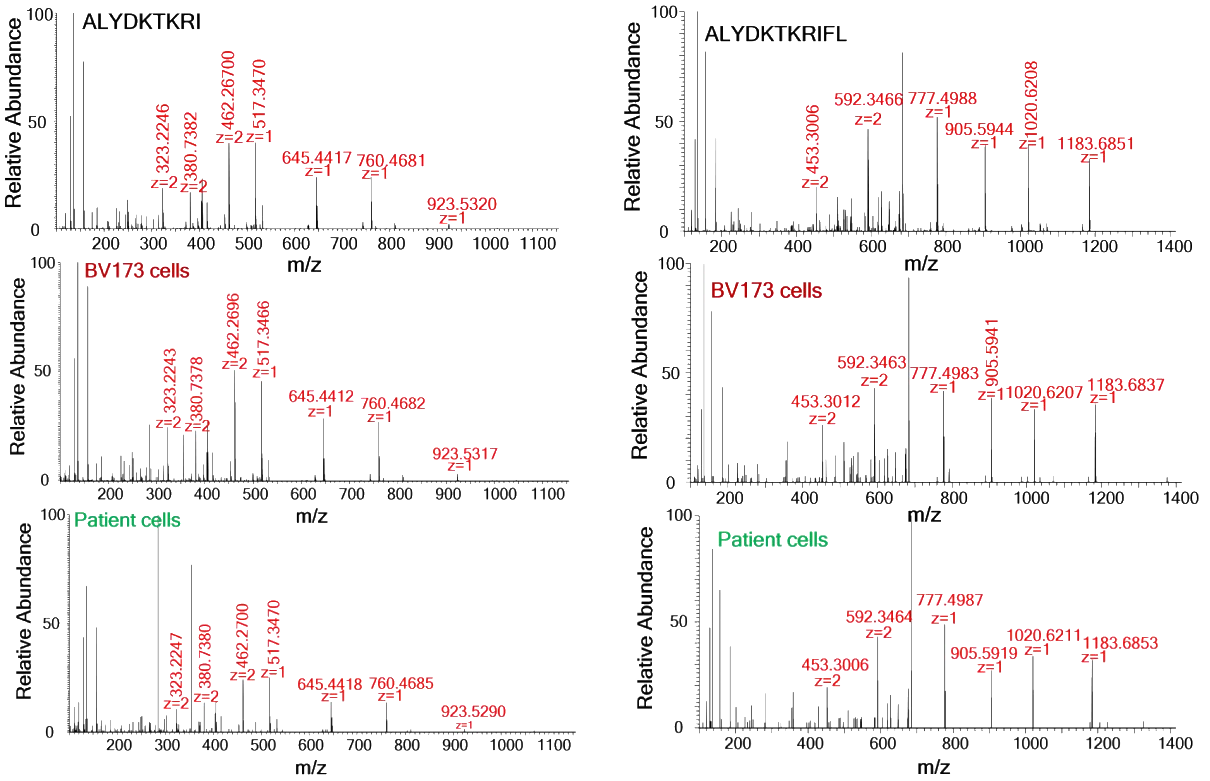

Supplementary Fig. 2: Peptide-1 and peptide-3 can be directly identified from patient leukemia cells

(a,b) Parallel Reaction Monitoring (PRM) analysis, targeting the presence of TdT peptide 1 ( $m/z=554.3289^{2+}$ ,  $369.8889^{3+}$ ) and peptide 3 ( $m/z=684.4044^{2+}$ ,  $456.6060^{3+}$ ) in leukemia cells from patient 119N and the leukemia cell line BV173. The extracted ion chromatograms (a) were generated from the ions highlighted in the MS/MS fragmentation spectra (b).

## SUPPLEMENTARY TABLES

**Supplementary Table 1:** HLA-A2-binding peptides derived from TdT

| Peptide number | Peptide sequence | Mascot ion score | Observed m/z | Predicted Affinity (nM)* | %Rank * | Predicted binding level* |
|----------------|------------------|------------------|--------------|--------------------------|---------|--------------------------|
| Pep-1          | ALYDKTKRI        | 45.6             | 554.3        | 194.79                   | 1.6     | Weak binder              |
| Pep-3          | ALYDKTKRIFL      | 41.4             | 684.4        | 115.17                   | 1.2     | Weak binder              |

\* Acquired from peptide-MHC class I binding prediction algorithm NetMHC version 4.0

**Supplementary Table 2: B-ALL and T-ALL patient characteristics**

| Pt. ID                                          | Sex | Age at diagnosis | Disease status | Classification           | Cytogenetic characteristics                                                                     | Risk stratification                                                      | Tx response        | Allo-HSCT* | Outcome |
|-------------------------------------------------|-----|------------------|----------------|--------------------------|-------------------------------------------------------------------------------------------------|--------------------------------------------------------------------------|--------------------|------------|---------|
| Pt. 2O                                          | M   | 4                | Primary        | B-ALL                    | t(12;21)                                                                                        | Intermediate risk                                                        | complete remission | no         | alive   |
| Pt.9O                                           | M   | 5                | Primary        | B-ALL                    | t(1;19), hyperdiploidy                                                                          | Standard risk                                                            | complete remission | no         | alive   |
| Pt. 20O                                         | F   | 2                | Primary        | B-ALL                    | del(7)(p11), dic(9;20)                                                                          | Intermediate risk                                                        | complete remission | no         | alive   |
| Pt. 21O                                         | F   | 1                | Primary        | B-ALL                    | t(12;21)                                                                                        | Intermediate risk                                                        | complete remission | no         | alive   |
| Pt. 33O                                         | F   | 7                | Primary        | B-ALL                    | Hyperdiploidy                                                                                   | Intermediate risk                                                        | complete remission | no         | alive   |
| Pt. 40O                                         | F   | 3                | Primary        | B-ALL                    | Normal karyotype                                                                                | Intermediate risk                                                        | complete remission | no         | alive   |
| Pt. 1N                                          | F   | 18               | Primary        | B-ALL                    | BCR-ABL1 (minor); 46,XX, der(9)t(1;9)(q12;q12), ider(9)(q10)t(9;22)(q34;q22), der(22)t(q34;q12) | High risk                                                                | Complete remission | Yes        | Alive   |
| Pt. 9N                                          | F   | 60               | Primary        | B-ALL                    | BCR-ABL1 (minor); 46,XX, t(9;22)(q34;q11)                                                       | High risk                                                                | Complete remission | No         | Alive   |
| Pt. 119N                                        | F   | 61               | Primary**      | B-ALL                    | BCR-ABL                                                                                         | High risk                                                                | Refractory         | Yes***     | Dead    |
| Pt. 32N                                         | M   | 33               | Primary        | T-ALL                    | SIL-TAL1 fusion; 47,XY, t(11;14)(p15;q11)                                                       | High risk                                                                | Refractory         | No         | Dead    |
| Pt. 40N                                         | M   | 17               | Primary        | T lymphoblastic lymphoma | 46,XY                                                                                           | High risk                                                                | Complete remission | No         | Alive   |
| Pt. 82N                                         | M   | 28               | Primary        | T-ALL                    | 46,XY, del(16p21)                                                                               | High risk                                                                | Complete remission | No         | Alive   |
| Pt. 4L                                          | M   | 43               | primary        | T ALL                    | t(9;14), t(11;14)                                                                               | -                                                                        | -                  | -          | -       |
| Pt. 8L                                          | M   | 40               | primary        | T ALL                    | Normal karyotype                                                                                | -                                                                        | -                  | -          | -       |
| Pt. 9L                                          | M   | 35               | primary        | T ALL                    | -                                                                                               | -                                                                        | -                  | -          | -       |
| Pt. 10L                                         | M   | 24               | Primary        | T ALL                    | Normal karyotype                                                                                | Standard risk                                                            | -                  | -          | -       |
| * Allogeneic hematopoietic stem cell transplant |     |                  |                |                          | **CML in TdT+ lymphoid blasts crisis                                                            | ***AlloHSCT and stem cell transplant with reduced-intensity conditioning |                    |            |         |

**Supplementary Table 3:** TdT and CD19 status of leukemic cells from pediatric B-ALL patients before and after relapse following CD19 CAR T cell therapy

| r/r B-ALL |            |                    | TdT**      |           | CD19**     |           |
|-----------|------------|--------------------|------------|-----------|------------|-----------|
| ID        | age/gender | Disease status     | prior CART | post-CART | prior CART | post-CART |
| 1         | 8y/f       | 3rd relapse*       | +          | +         | +          | +         |
| 2         | 19y/m      | 2nd relapse        | +          | +         | +          | +         |
| 3         | 15y/m      | refractory disease | +          | +         | +          | -         |
| 4         | 9y/m       | 2nd relapse*       | +          | +         | +          | -         |
| 5         | 12y/m      | 2nd relapse        | +          | +         | +          | -         |

\*after allogeneic hematopoietic stem cell transplantation

\*\*leukemic B-ALL blasts, immunophenotyping by flow cytometry

**Supplementary Table 4:** TdT status of leukemic cells from pediatric T-ALL patient at diagnosis and during disease course

| T-ALL      |                   | TdT expression (%)* |              |         |            |  |
|------------|-------------------|---------------------|--------------|---------|------------|--|
| age/gender | Primary diagnosis | Day 15, MRD+        | Day 29, MRD+ | Relapse | Outcome    |  |
| 13 y/m     | 100               | 100                 | 100          | 100     | HSCT, died |  |

\*% of leukemic T-ALL blasts, immunophenotyping by flow cytometry



**Supplementary Table 5: List of antibodies used in the study with characteristics**

| CD number/protein target/dye/kit | Fluorochrome                                                    | Clone                | Species           | Supplier                     | Catalogue number                                              | Dilution factor                                            | Validated research application |
|----------------------------------|-----------------------------------------------------------------|----------------------|-------------------|------------------------------|---------------------------------------------------------------|------------------------------------------------------------|--------------------------------|
| CD14                             | PE-Cy5                                                          | 61D3                 | Mouse, anti-human | eBiosciences                 | 15-0149-42                                                    | 1:160-200                                                  | Flow cytometry                 |
| HLA-A2                           | BV650, PE, PE-Cy7                                               | BB7.2                | Mouse, anti-human | BioLegend, Diatec            | 343324, 343306, 343314, 8750                                  | 1:200, 1:30                                                | Flow cytometry                 |
| CD62L                            | Pe-Cy7                                                          | DREG-56              | Mouse, anti-human | BioLegend                    | 304822                                                        | 1:200                                                      | Flow cytometry                 |
| CD56                             | Pe-Cy7                                                          | B159                 | Mouse, anti-human | BD                           | 555515                                                        | 1:40                                                       | Flow cytometry                 |
| CD57                             | BV605                                                           | HNK-1                | Mouse, anti-human | BioLegend                    | 393303                                                        | 1:200                                                      | Flow cytometry                 |
| CD45RO                           | APC                                                             | UCHL1                | Mouse, anti-human | BioLegend                    | 304210                                                        | 1:200                                                      | Flow cytometry                 |
| CD45RA                           | PE                                                              | HI100                | Mouse, anti-human | BD                           | 555489                                                        | 1:20                                                       | Flow cytometry                 |
| CCR7                             | FITC                                                            | G043H7               | Mouse, anti-human | BioLegend                    | 353216                                                        | 1:100                                                      | Flow cytometry                 |
| CD137                            | PE                                                              | 4B4-1                | Mouse, anti-human | BD, Thermo Fisher Scientific | 555956, A51019                                                | 1:20, 1:200                                                | Flow cytometry                 |
| CD45                             | AF700, BV605                                                    | HI30                 | Mouse, anti-human | BioLegend                    | 304024, 304042                                                | 1:200-600, 1:200                                           | Flow cytometry                 |
| TDT                              | APC                                                             | E17-1519             | Mouse, anti-human | BD                           | 332791                                                        | 1:20                                                       | Flow cytometry                 |
| CD10                             | PE-Cy7, PE-Cy5, PE                                              | HI10a                | Mouse, anti-human | BioLegend                    | 982210, 312206, 312204                                        | 1:100-200, 1:300-500, 1:200                                | Flow cytometry                 |
| CD19                             | BV421, BV785, PE-Cy5                                            | SJ25c1, HI10a, HIB19 | Mouse, anti-human | BioLegend                    | 363018, 302239, 302240, 302210                                | 1:200, 1:400                                               | Flow cytometry                 |
| CD38                             | PE/Dazzle594                                                    | HIT2                 | Mouse, anti-human | BioLegend                    | 303538                                                        | 1:100                                                      | Flow cytometry                 |
| CD34                             | APC, BUV395, BV785, PerCP-Cy5.5                                 | 8G12, 561, 8G12      | Mouse, anti-human | BD, BioLegend, BD            | 345804, 745727, 343626, 347222                                | 1:200, 1:80, 1:200, 1:20                                   | Flow cytometry                 |
| CD1a                             | PE/Cy7                                                          | HI149                | Mouse, anti-human | BioLegend                    | 300122                                                        | 1:50                                                       | Flow cytometry                 |
| CD2                              | PE-Cy5                                                          | RPA-2.10             | Mouse, anti-human | BioLegend                    | 300210                                                        | 1:300                                                      | Flow cytometry                 |
| CD3                              | BB515, PE-Cy5, PerCP-Cy5.5, BV605, FITC, APC-Cy7, BV421, PE-Cy7 | HIT3a, SK7, UCHT1    | Mouse, anti-human | BD, BioLegend, BD            | 565100, 30031, 344808, 344836, 344804, 300426, 562426, 300420 | 1:100-200, 1:300, 1:200, 1.200, 1:200, 1:200, 1:100, 1:200 | Flow cytometry                 |
| CD8a                             | APC-Cy7, PE-Cy5, BV421, AF700                                   | RPA-T8, HIT8a        | Mouse, anti-human | BioLegend                    | 301016, 301010, 301036, 300920                                | 1:80-300, 1:300, 1:200, 1:200                              | Flow cytometry                 |
| CD4                              | BUV395, PE-Cy5, BV421                                           | RPA-T4, OKT4         | Mouse, anti-human | BD, BioLegend                | 564724, 300510, 317440                                        | 1:300, 1:160-300, 1:200                                    | Flow cytometry                 |
| CD5                              | PE-Cy7, PerCP-Cy5.5                                             | UCHT2, L17F12        | Mouse, anti-human | BioLegend                    | 300622, 364006                                                | 1:150, 1:200                                               | Flow cytometry                 |
| CD7                              | PE-Cy7, PE                                                      | M-T701               | Mouse, anti-human | BD                           | 555362, 561934                                                | 1:40, 1:200                                                | Flow cytometry                 |
| CD33                             | BV785                                                           | WM-53                | Mouse, anti-human | BioLegend                    | 303428                                                        | 1:200                                                      | Flow cytometry                 |
| CD11b                            | PE-Cy7                                                          | ICRF44               | Mouse, anti-human | BioLegend                    | 301308                                                        | 1:160                                                      | Flow cytometry                 |
| CD20                             | PE-Cy7, BV785                                                   | 2H7                  | Mouse, anti-human | BioLegend                    | 302308, 302356                                                | 1:160-200, 1:200                                           | Flow cytometry                 |

|                                                            |              |         |                     |                          |                |                     |                |
|------------------------------------------------------------|--------------|---------|---------------------|--------------------------|----------------|---------------------|----------------|
| CD235a,b                                                   | PE-Cy7       | HIR2    | Mouse, anti-human   | BioLegend                | 306606         | 1:500               | Flow cytometry |
| CD99                                                       | FITC         | DN16    | Mouse, anti-human   | BIO-RAD                  | MCA1850F       | 1:400               | Flow cytometry |
| HLA class I                                                | PE           | W6/32   | Mouse, anti-human   | BioLegend                | 311406         | 1:100               | Flow cytometry |
| CD45                                                       | BV510, BV605 | 30-F11  | Rat, anti-mouse     | BioLegend                | 103138, 103155 | 1:400-800,<br>1:200 | Flow cytometry |
| CD45.1                                                     | PE           | A20     | Mouse, anti-mouse   | BioLegend                | 110708         | 1:600               | Flow cytometry |
| TCRb                                                       | PE           | H57-597 | Hamster, anti-mouse | BioLegend                | 109208         | 1:200               | Flow cytometry |
| Ter119                                                     | PE-Cy5       | TER-119 | Rat, anti-mouse     | BioLegend                | 116210         | 1:600               | Flow cytometry |
|                                                            |              |         |                     |                          |                |                     |                |
| 7AAD                                                       |              |         |                     |                          |                | 1:200               | Flow cytometry |
| DAPI                                                       |              |         |                     |                          |                | 1:50000             | Flow cytometry |
| LIVE/DEAD™<br>Fixable Near-IR                              |              |         |                     | Thermo Fisher Scientific | L10119         | 1:1000              | Flow cytometry |
| LIVE/DEAD™<br>Fixable Aqua Dead Cell Stain Kit             |              |         |                     | Thermo Fisher Scientific | L34957         | 1:200               | Flow cytometry |
| Cell Trace Violet                                          |              |         |                     | Thermo Fisher Scientific | C34557         | 1:3300              | Flow cytometry |
| 5-(and-6)-Carboxyfluorescein Diacetate, Succinimidyl Ester |              |         |                     | Thermo Fisher Scientific | C1157          | 1:2000              | Flow cytometry |
| Alexa Fluor™ 488 NHS Ester                                 | AF488        |         |                     | Invitrogen               | A20000         |                     | Flow cytometry |
| Streptavidin                                               | PE, APC      |         |                     | Thermo Fisher Scientific | S866, S868     |                     | Flow cytometry |
|                                                            |              |         |                     |                          |                |                     |                |
| Purified Mouse Anti-Human IFN-γ                            |              | NIB42   | Mouse, anti-human   | BD                       | 551221         | 1:500               | ELISA          |
| Biotin Mouse Anti-Human IFN-γ                              |              | 4S.B3   | Mouse, anti-human   | BD                       | 554550         | 1:500               | ELISA          |
| CBA Human Th1/Th2/Th17 Cytokine Kit                        |              |         |                     | BD                       | 560484         |                     | ELISA          |

## SUPPLEMENTARY METHODS

### **Immunopurification of EBV-LCL for identification of TdT-derived peptides presented on HLA**

EBV-LCL cells stably transduced with full-length TdT were lysed in 15 ml lysis buffer (50 mM Tris-Cl pH 8.0, 150 mM NaCl, 5 mM EDTA, 0.5% Zwittergent 3-12 (N-dodecyl-N,N-dimethyl-3-ammonio-1-propanesulfonate) and protease inhibitor (Complete, Roche Applied Science)) for 2 h at 0 °C (1). Lysates were successively centrifuged to remove nuclei (10 min, 2500 × *g*) and other insoluble material (45 min, 31,000 × *g*). Lysates were passed through a 1.5 ml CL-4B Sepharose column to preclear the lysate and subsequently passed through a 1.5 ml column containing 3.75 mg pan class I (W6/32) IgG coupled to protein A Sepharose (1). The W6/32 column was subsequently washed with 5 ml of lysis buffer, 5 ml of low salt buffer (20 mM Tris-Cl pH 8.0, 120 mM NaCl), 1 ml of high salt buffer (20 mM Tris-Cl pH 8.0, 1 M NaCl), and finally with 5 ml of low salt buffer. HLA α chain, β2m and peptides were eluted with 5 ml of 10% acetic acid, and filtered through 10 kDa filters (PAL incorporation) to remove HLA protein chains. The filtrate was purified by solid phase extraction (SPE) (Oasis HLB, Waters).

The SPE purified material was fractionated on a homemade SCX column (320 μm inner diameter, 15 cm, polysulfoethyl A 3 μm, Poly LC) run at 4 μl/min. Gradients were run for 10 min at 100% solvent A (100% water/0.1% TFA), after which a linear gradient started to reach 100% solvent B (250 mM KCl, 35% ACN/0.1% TFA) over 15 min, followed by 100% solvent C (500 mM KCl, 35% ACN/0.1% TFA) over the next 15 min. The gradient remained at 100% solvent C for 5 min and then switched again to 100% solvent A. Twenty 4-μl fractions were collected in vials pre-filled with 100 μl 95/3/0.1 water/ACN/FA v/v/v.

### **LC-MS/MS Analysis**

The SCX fractions were analyzed via on-line nano-HPLC-MS with a system consisting of a conventional Agilent 1100 gradient HPLC system (Agilent, Waldbronn, Germany), as described by Meiring et al. (2) and an LTQ-FT Ultra mass spectrometer (Thermo, Bremen, Germany). Fractions were injected onto a homemade precolumn (100 μm × 15 mm; Reprisil-Pur C18-AQ 3

µm, Dr. Maisch, Ammerbuch, Germany) and eluted via a homemade analytical nano-HPLC column (15 cm × 50 µm; Reprosil-Pur C18-AQ 3 µm). The gradient was run from 0% to 50% solvent B (10/90/0.1 water/ACN/FA v/v/v) over 20 min. The nano-HPLC column was drawn to a tip of ~5 µm and acted as the electrospray needle of the MS source. The mass spectrometer was operated in data dependent mode, automatically switching between MS and MS/MS acquisition. Full scan mass spectra were acquired in a Fourier transform ion cyclotron resonance mass spectrometer with a resolution of 25,000 at a target value of 5,000,000. The two most intense ions were then isolated for accurate mass measurements by a selected ion monitoring scan in Fourier transform ion cyclotron resonance with a resolution of 50,000 at a target accumulation value of 50,000. The selected ions were then fragmented in the linear ion trap using collision-induced dissociation at a target value of 10,000.

The tandem mass spectra were matched against the homo sapiens canonical (70,000 entries) database using the Mascot search engine (version 2.2.04, Matrix Science, London, UK) with a precursor mass tolerance of 2 ppm, with methionine oxidation and cysteinyl on cysteine as variable modifications and a product ion tolerance of 0.5 Da.

In a post-analysis process, raw data were first converted to peak lists using Proteome Discoverer version 2.2 (Thermo Electron), and then submitted to the Uniprot Homo sapiens database (71,591 entries), using Mascot v. 2.2.07 ([www.matrixscience.com](http://www.matrixscience.com)) for protein identification. Mascot searches were with 2 ppm and 0.5 Da deviation for precursor and fragment mass, respectively, and no enzyme was specified. Methionine oxidation and cysteinyl on cysteine were set as variable modifications. Peptides with MASCOT scores <35 were generally discarded. Tandem mass spectra of TdT derived peptides were manually inspected. The correct identification of the TdT derived peptides was confirmed by comparison of the eluted and synthetic tandem mass spectra.

### **Immunoprecipitation-Targeted Mass spectrometry (IP-MS) analysis of TdT peptides presented on HLA of leukemia cells**

The leukemia cell line BV173 cells (350 Million) or leukemia cells from patient 119N (450 Million) were lysed in PBS containing 1% lauryl maltoside, 1mM EDTA, 1mM PMSF and Sigma protease inhibitors (1:200) for 1 hour at 4°C. The clarified cell lysates (12,000 RPM, 30 minutes) were added to 500µL of AminoLink plus bead slurry (ThermoFisher Scientific) coated with pan HLA class I specific antibody (W6/32, BioXcell) and incubated for 3 hours at 4°C. Following the manufacturers suggestions, 10mg of W6/32 antibody was coupled to 2 ml of AminoLink plus bead slurry. After a 3-hour incubation with cell lysates, the beads were washed with 3 mL of 0.1M Tris-HCl/150mM NaCl, 3 ml of 0.1M Tris-HCl/400mM NaCl, and again with 3 mL of 0.1M Tris-HCl/150mM NaCl and finally with 3 mL of 0.1 M Tris-HCl. The HLA bound peptides were then eluted with 1 mL of 1% TFA, followed by another two elutions, each with 1mL of 1% TFA. The peptide elutions were pooled and then loaded on to 10kDa molecular weight cutoff filters for removal of B2M and heavy chain. The filtrate was then loaded on to the Discovery DSC-C18 SPE column for desalting of the peptides before MS analysis. The peptides were vacuum concentrated and dissolved in 25 µL of 3% acetonitrile containing 0.1% TFA. The peptide solution (5 µL) was analyzed using an Ultimate 3000 nano-UHPLC system (Dionex, Sunnyvale, CA, USA) connected to a Q Exactive mass spectrometer (ThermoElectron, Bremen, Germany) equipped with a nano electrospray ion source. For liquid chromatography separation, an Acclaim PepMap 100 column (C18, 3 µm beads, 100 Å, 75 µm inner diameter) capillary of 50 cm bed length was used. A flow rate of 300 nL/min was employed with a solvent gradient of 10-35% B in 95 min, to 50% B in 13 min and then to 80% B in 2 min. Solvent A was 0.1% formic acid and solvent B was 0.1% formic acid/90% acetonitrile. The mass spectrometer was operated in Parallel Reaction Monitoring (PRM) mode, to specifically target the presence of TdT peptide 1 ( $m/z = 554.3289^{2+}$ ,  $369.8889^{3+}$ ), eluting within a retention time window of 10-25 minutes, as determined using synthetic analog. TdT peptide 3 ( $m/z = 684.4044^{2+}$ ,  $456.6060^{3+}$ ) was targeted within a retention time window of 38-55 minutes. The MS/MS spectra using higher-energy collision induced dissociation (HCD) were acquired with the resolution  $R = 35,000$ , after accumulation to a target of  $2e5$ . The normalized collision energy was set to NCE 27, isolation window was  $m/z = 1.7$  with an offset of  $0.3m/z$ . The maximum allowed ion accumulation for the MS/MS spectrum was 120ms. Raw data were analyzed using the Xcalibur™ software.

## REFERENCES

1. C. Hassan *et al.*, The human leukocyte antigen-presented ligandome of B lymphocytes. *Mol Cell Proteomics* **12**, 1829-1843 (2013).
2. H. D. Meiring, E. van der Heeft, G. J. ten Hove, A. P. J. M. de Jong, Nanoscale LC-MS(n): technical design and applications to peptide and protein analysis. *Journal of Separation Science* **25**, 557-568 (2002).
